# Supplementary material for: Si nanoflake-assembled blocks towards high initial coulombic efficiency anodes for lithium-ion batteries
Source: Royal Society of Chemistry journal article supplement (doi:10.1039/c8cc06008h), 2018-01-01
Supplement: c8cc06008h1.pdf [file c8cc06008h1.pdf]

## Supplementary information

### **Si nanoflake-assembled blocks towards high initial coulombic efficiency anodes for lithium ion batteries**

Xiangyang Zhou, Yongpeng Ren, Juan Yang, Jing Ding, Jiaming Zhang, Tingjie Hu,  
and Jingjing Tang \*

School of Metallurgy and Environment, Central South University, Changsha 410083,  
China.

\* Corresponding author.  
E-mail: tangjj@csu.edu.cn

## ***Experimental Section***

**Synthesis of copper modified silica.** Typically, for Cu-SiO<sub>2</sub> preparation, 1.3g copper nitrate trihydrate (Cu(NO<sub>3</sub>)<sub>2</sub>·3H<sub>2</sub>O, Sinopharm Chemical Reagent, 99%) was dissolved in mixture of 50mL deionized (DI) water, 32.5mL ethanol and 18mL ammonia solution under stirring, generating cyanous solution. After intensive mixed, this solution was injected into 91mL ethanol and 9mL TEOS (Aladdin, 98%) under vigorously stirring. The mixture was stirred continuously for 3h. All of these procedures were operated under ambient pressure and temperature. The as-prepared light blue precipitation was filtrated and washed by ethanol and DI water alternately before drying in a convection oven at 70°C overnight. Other silica samples were synthesized via similar process, except for changing the amount of Cu(NO<sub>3</sub>)<sub>2</sub>·3H<sub>2</sub>O which were marked as LCu-SiO<sub>2</sub> (little Cu(NO<sub>3</sub>)<sub>2</sub>·3H<sub>2</sub>O amount of 0.325g), HCu-SiO<sub>2</sub> (high Cu(NO<sub>3</sub>)<sub>2</sub>·3H<sub>2</sub>O amount of 2.6g) and silica (pristine silica).

**Synthesis of silicon.** Typically, 1.0 g of Cu-SiO<sub>2</sub> and 10g NaCl were evenly mixed with 0.9g magnesium powder. Then, the mixture was sealed in Swagelok-type reactor in an argon-filled glove box with O<sub>2</sub> content below 0.1ppm. The reactor was coaxially placed in a horizontal tube furnace with quartz tube. The quartz tube was continuously swept with pure argon, heated to 700°C and kept for 6h. Afterward the product was treated with HCl solution and HF solution. The obtained Si product was dried at 70°C and marked as Cu-Si. Similarly, other Si samples were marked as HCu-Si (from HCu-SiO<sub>2</sub>), LCu-Si (from LCu-SiO<sub>2</sub>), p-Si (from pristine silica).

**Electrochemical characterization.** 2025 type coin cell was assembled in argon-filled glove box with O<sub>2</sub> content below 0.1ppm. Working electrodes were prepared by casting the slurry with weight ratio of Si:

acetylene black: sodium alginate=6:2:2. DI water was used for dispersing the slurry before coating on copper foil. The mass loading of Si micro-plates was 0.8 mg/cm<sup>2</sup>-1.5 mg/cm<sup>2</sup>. The electrode was thoroughly dried at 80°C in a vacuum oven for 8h prior to being cut. Lithium foil was employed as the counter electrode. Coin-type cell was CR2025. Celgard 2400 was used as separator. The electrolyte was solution of 1M LiPF<sub>6</sub> in an iso-volume mixture of ethylene carbonate (EC) and diethyl carbonate (DEC), in which 10wt% fluoroethylene carbonate (FEC) was added. Galvanostatic charge-discharge cycling was carried out on LAND CT-2001A in the potential range 0.01-1.2 V vs. Li/Li<sup>+</sup> at a certain current density. The specific capacity was calculated based on mass of silicon. The charge/discharge rates were calculated with respect to the theoretical capacity of Si (4200mAh g<sup>-1</sup>). Cyclic voltammetry (CV) was performed in the potential range of 0.01-1.2V vs. Li/Li<sup>+</sup> at an scan rate of 0.1mV S<sup>-1</sup>. CV were both performed on electrochemical workstation (PARSTAT MC).

**Table S1** Crystallinity and pore information of as prepared Si samples

|        | XRD<br>full width at half<br>maximum, ° | N <sub>2</sub> adsorption/desorption   |                                                     |                                                              | Raman spectrum[1-2] |                         |            |
|--------|-----------------------------------------|----------------------------------------|-----------------------------------------------------|--------------------------------------------------------------|---------------------|-------------------------|------------|
|        |                                         | BET, m <sup>2</sup><br>g <sup>-1</sup> | macro<br>volume, cm <sup>3</sup><br>g <sup>-1</sup> | micro/<br>meso<br>volume, cm <sup>3</sup><br>g <sup>-1</sup> | amorphous,<br>%     | grain<br>boundary,<br>% | crystal, % |
| HCu-Si | 0.00314                                 | 20.9                                   | 0.056                                               | 0.05                                                         | 0.7                 | 3.4                     | 96.0       |
| Cu-Si  | 0.00314                                 | 21.7                                   | 0.135                                               | 0.05                                                         | 0.7                 | 2.1                     | 97.2       |
| LCu-Si | 0.00349                                 | 183.7                                  | 0.174                                               | 0.43                                                         | 2.1                 | 5.8                     | 92.1       |
| p-Si   |                                         | 221.2                                  | 0.08                                                | 0.6                                                          |                     |                         |            |

**Table S2** Copper content in samples based on ICP

|                     |                     | Weight percent of Cu<br>in this sample, % |                    | Main elements<br>in this sample |
|---------------------|---------------------|-------------------------------------------|--------------------|---------------------------------|
|                     |                     |                                           |                    |                                 |
| Cu-SiO <sub>2</sub> | pristine            | 9.77                                      |                    | Si, O, Cu                       |
| Cu-Si               | before acid washing | 6.02                                      | (Mg content=42.9%) | Mg, Si, Cu, O                   |
|                     | after acid washing  | 0.03                                      |                    | Si, Cu                          |
| HCu-Si              | after acid washing  | 0.12                                      |                    | Si, Cu                          |
| LCu-Si              | after acid washing  | 0.01                                      |                    | Si, Cu                          |
| p-Si                | after acid washing  | <0.01                                     |                    | Si, Cu                          |

**Table S3** Typical coulombic efficiency of past works

| Materials                               | Method of preparing Si   | Initial CE        | Ref.         |
|-----------------------------------------|--------------------------|-------------------|--------------|
| Si blocks assembled<br>from nano-flakes | Cu modified Mg reduction | 86.1% +3%/-<br>1% | This<br>work |
| Si@solid polymer                        | CVD                      | 79.9%             | 3            |
| Si@TiO <sub>2</sub>                     | Commercial Si            | 74%               | 4            |
| Porous Si                               | Dealloy of Si/Mg alloy   | 85%               | 5            |
| Si nano-particles                       | Commercial Si            | 75%               | 6            |
| 3D porous Si                            | Traditional Mg reduction | 62.5%             | 7            |

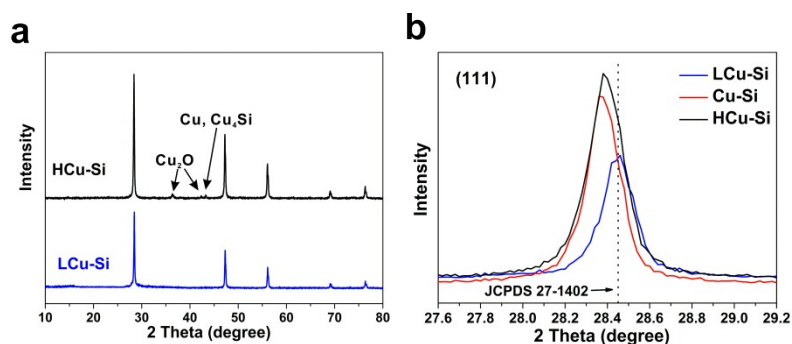

Fig. S1 XRD of LCu-Si and HCu-Si (a); detailed XRD patterns of Si (111) planes from LCu-Si, Cu-Si and HCu-Si (b)

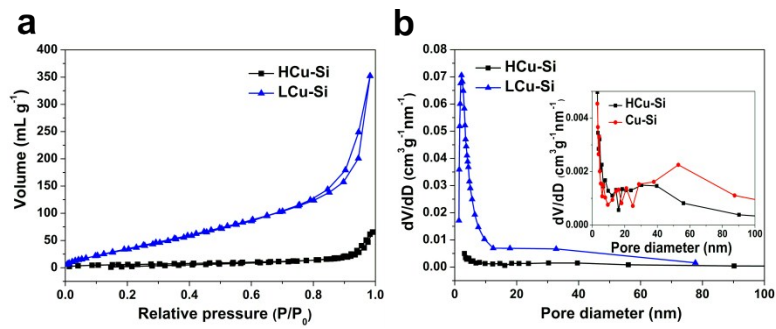

Fig. S2  $N_2$  adsorption/desorption curves (a) and pore volume distribution (based on BJH desorption data) of LCu-Si and HCu-Si (b), detailed comparison of pore volume distribution between HCu-Si and Cu-Si (b inset)

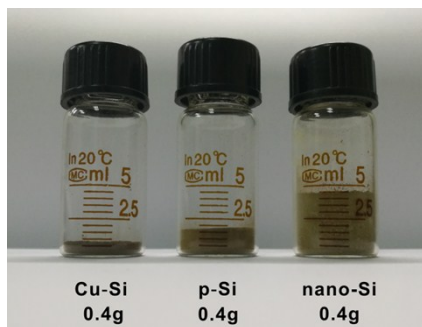

Fig. S3 Vibrated powders of Cu-Si, p-Si, commercial nano-Si with a certain mass of 0.4g

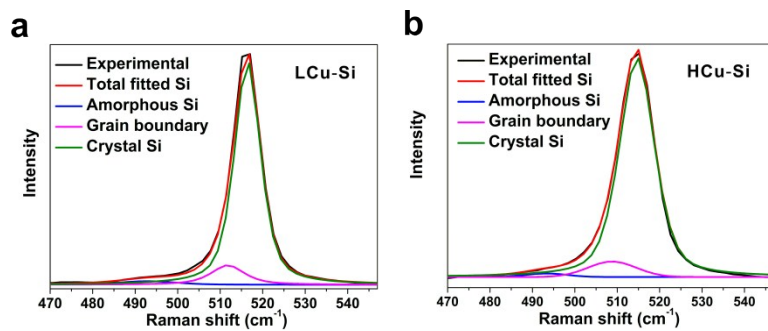

Fig. S4 Fitted Raman spectrum of LCu-Si (a) and HCu-Si (b)

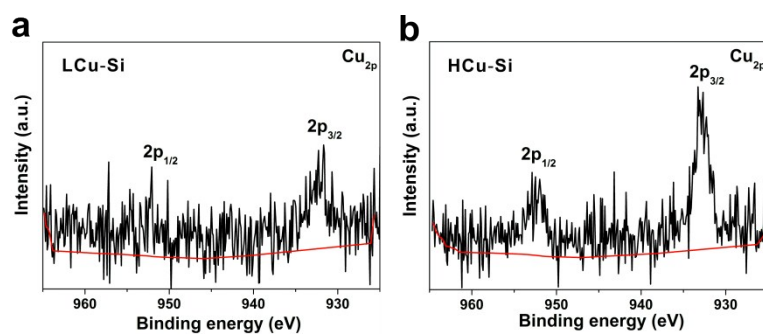

Fig. S5  $Cu_{2p}$  peaks (XPS) of LCu-Si and HCu-Si

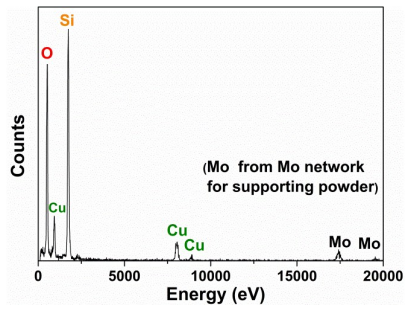

Fig. S6 EDS of Cu-SiO<sub>2</sub>

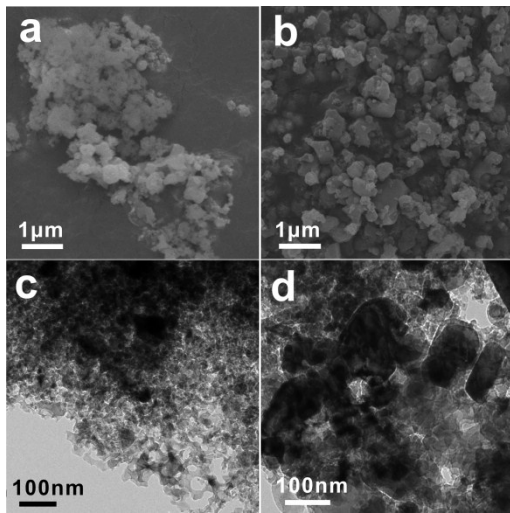

Fig. S7 SEM images of LCu-Si (a) and HCu-Si (b); TEM images of LCu-Si (c) and HCu-Si (d)

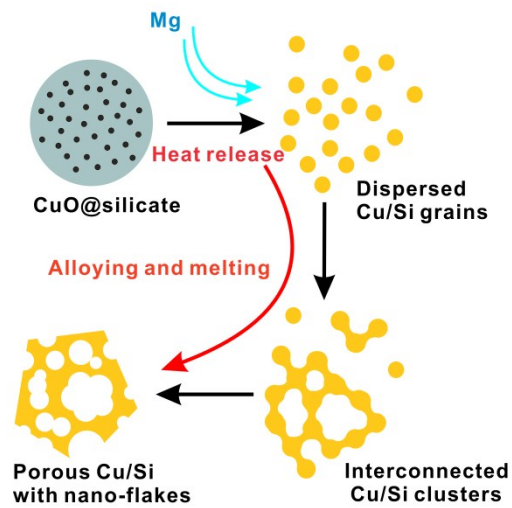

Fig. S8 Illustration of morphological evolution of Si blocks with flake-like structures

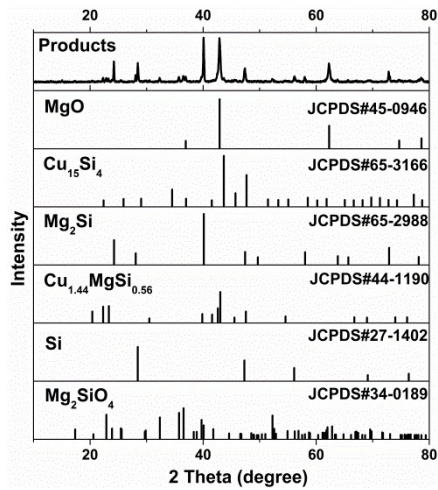

Fig. S9 XRD pattern of the Mg reduction products of Cu-SiO<sub>2</sub> before acid washing indicates they are attributed to MgO, Cu<sub>15</sub>Si<sub>4</sub>, Mg<sub>2</sub>Si, Cu<sub>1.44</sub>MgSi<sub>0.56</sub>, Si and Mg<sub>2</sub>SiO<sub>4</sub>, respectively

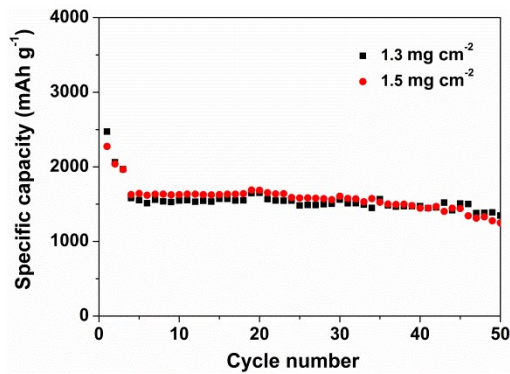

Fig. S10 Cyclic performances of Cu-Si anodes with mass loadings of 1.3mg cm<sup>-2</sup> and 1.5mg cm<sup>-2</sup>

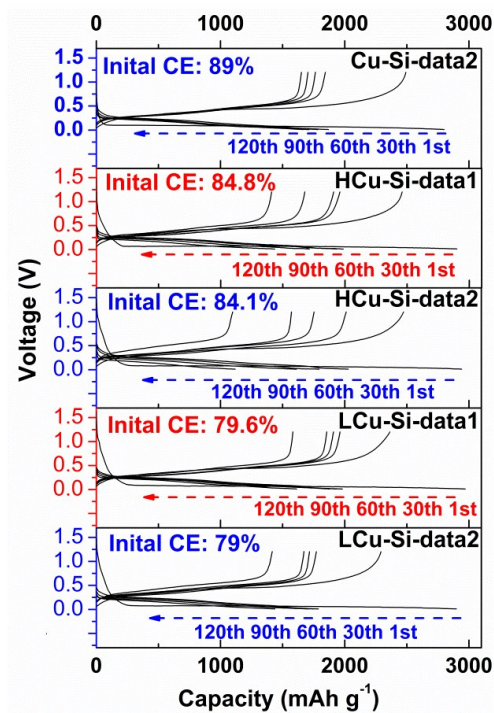

Fig. S11 Data of repeated experiments of the Cu-Si, HCu-Si and LCu-Si

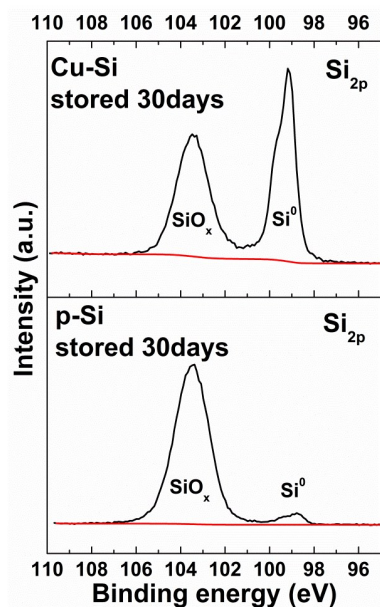

Fig. S12 XPS of Cu-Si and p-Si after 30days in air

## Reference

- 1 S. Veprek, F. Sarott, Z. Iqbal, Phys. Rev. B, 1987, **36**, 3344
- 2 G. Yue, J.D. Lorentzen, J. Lin, D. Han, Q. Wang, Appl. Phys. Lett., 1999, **75**, 492-494.
- 3 Tianyi Ma, Xiangnan Yu, Xiaolu Cheng, Huiyu Li, Wentao Zhu, and Xinping Qiu. ACS Appl. Mater. Interfaces, 2017, **9**, 13247-13254
- 4 Yang Jin, Sa Li, Akihiro Kushima, Xiaoquan Zheng, Yongming Sun, Jin Xie, Jie Sun, Weijiang Xue, Guangmin Zhou, Jiang Wu, Feifei Shi, Rufan Zhang, Zhi Zhu, Kangpyo So, Yi Cui and Ju Li. Energ. Environ. Sci., 2017, **10**, 580
- 5 Yongling An, Huifang Fei, Guifang Zeng, Lijie Ci, Shenglin Xiong, Jinkui Feng, and Yitai Qian. ACS Nano, 2018,
- 6 Liang Li, Zicheng Zuo, Hong Shang, Fan Wang, Yuliang Li. Nano Energy, 2018, **53**, 135-143
- 7 Xiuxia Zuo, Yonggao Xia, Qing Ji, Xiang Gao, Shanshan Yin, Meimei Wang, Xiaoyan Wang, Bao Qiu, Anxiang Wei, Zaicheng Sun, Zhaoping Liu, Jin Zhu, and Ya-Jun Cheng. ACS Nano, 2017, **11**, 889-899
